# Supplementary material for: Impact on the Nutritional Status and Inflammation of Patients with Cancer Hospitalized after the SARS-CoV-2 Lockdown
Source: MDPI journal article supplement (doi:10.3390/nu14132754), 2022-07-02
Supplement: s1 [file s1]

**Table S1.** Distribution of types of treatment depending on mechanism of action in both time periods.

|      | Monoclonal<br>antibodies | Alkylating<br>agents | Platinum<br>derivatives | Antimetabolite<br>agents | Topoisomerase<br>inhibitors | Microtubule<br>inhibitors | Others | Polytheraphy | <i>p</i> |
|------|--------------------------|----------------------|-------------------------|--------------------------|-----------------------------|---------------------------|--------|--------------|----------|
| 2019 | 8.3%                     | 3.0%                 | 0.7%                    | 0.9%                     | 0.9%                        | 3.9%                      | 7.8%   | 74.5%        | 0.158    |
| 2020 | 7.1%                     | 0.7%                 | 1.4%                    | 1.1%                     | 0.0%                        | 2.1%                      | 7.4%   | 80.2%        |          |

**Table S2.** Distribution of tumor staging according to MUST score and year.

|       |          | Stage I | Stage II | Stage III | Stage IV | <i>p</i> |
|-------|----------|---------|----------|-----------|----------|----------|
| 2019  | MUST < 2 | 0.4%    | 3.9%     | 14.9%     | 80.7%    | 0.798    |
|       | MUST ≥ 2 | 0.0%    | 3.2%     | 11.1%     | 85.7%    |          |
| 2020  | MUST < 2 | 6.8%    | 7,8%     | 18.4%     | 67.0%    | 0.283    |
|       | MUST ≥ 2 | 3.3%    | 0.0%     | 11.5%     | 84.6%    |          |
| Total | MUST < 2 | 2.4%    | 5.1%     | 16.0%     | 76.4%    | 0.305    |
|       | MUST ≥ 2 | 1.1%    | 2.2%     | 11.2%     | 85.4%    |          |

**Table S3.** Distribution of types of treatment depending on mechanism of action in relation with mortality.

|          | Monoclonal<br>antibodies | Alkylating<br>agents | Platinum<br>derivatives | Antimetabolite<br>agents | Topoisomerase<br>inhibitors | Microtubule<br>inhibitors | Others | Polytheraphy | <i>p</i> |
|----------|--------------------------|----------------------|-------------------------|--------------------------|-----------------------------|---------------------------|--------|--------------|----------|
| Survived | 6.1%                     | 2.2%                 | 0.7%                    | 0.9%                     | 0.7%                        | 3.3%                      | 8.3%   | 77.9%        | 0.417    |
| Death    | 10.7%                    | 1.9%                 | 1.5%                    | 1.1%                     | 0.4%                        | 3.1%                      | 6.5%   | 74.8%        |          |

**Table S4.** Cox-regression analysis regarding the influence of year of admission, stage, treatment, sex, age, MUST score and BMI on mortality.

|            | Hazard Ratio | Std. Err. | z     | P < /z/ | 95% C.I. |       |
|------------|--------------|-----------|-------|---------|----------|-------|
| Year       | 1.279        | 0.213     | 1.48  | 0.140   | 0.923    | 1.773 |
| Stage      | 1.401        | 0.174     | 2.71  | 0.007   | 1.098    | 1.788 |
| Treatment  | 1.153        | 0.223     | 0.74  | 0.462   | 0.789    | 1.685 |
| Sex        | 1.139        | 0.1772    | 0.84  | 0.401   | 0.840    | 1.545 |
| Age        | 1.018        | 0.006     | 3.03  | 0.002   | 1.006    | 1.031 |
| MUST score | 1.049        | 0.0780    | 0.64  | 0.522   | 0.907    | 1.213 |
| BMI        | 0.998        | 0.0189    | -0.09 | 0.931   | 0.962    | 1.036 |

**Table S5.** Distribution of mortality according to MUST score.

|          | Survived | Mortality | <i>p</i> |
|----------|----------|-----------|----------|
| MUST < 2 | 67.8%    | 32.2%     | <0.001   |
| MUST ≥ 2 | 45.7%    | 54.3%     |          |

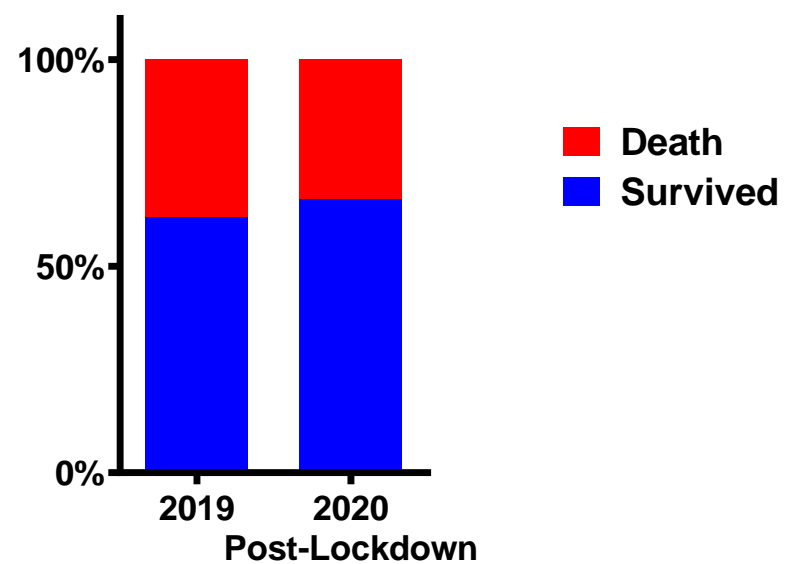

**Figure S1.** Distribution of mortality rates of patients admitted in 2019 and 2020 post-lockdown. Differences between time periods were computed by  $\chi^2$  analysis.
